# Supplementary material
Source: PubMed Central journal article supplement (PMC3074931)
Supplement: NIHMS270752-supplement-01.pdf [file NIHMS270752-supplement-01.pdf]

# Supplemental Data Table 1

## Combined Differential Expression Table

| <b>Cohort</b> | <b>Fraction</b> | <b>p value</b> | <b>m/z</b> | <b>fold</b> | <b>ID</b>                | <b>MASCOT score</b> | <b>number of peptides</b> | <b>Percent coverage</b> |
|---------------|-----------------|----------------|------------|-------------|--------------------------|---------------------|---------------------------|-------------------------|
| 1             | 3               | 0.047          | 4570       | +2.1        |                          |                     |                           |                         |
| 1             | 4               | 0.047          | 5050*      | -1.8        |                          |                     |                           |                         |
| 2             | 2               | 0.021          | 5322       | +4.3        |                          |                     |                           |                         |
| 2             | 2               | 0.021          | 5402       | +5.1        |                          |                     |                           |                         |
| 1             | 3               | 0.028          | 7925**     | +3.0        |                          |                     |                           |                         |
| 1             | 3               | 0.028          | 7975**     | +2.0        |                          |                     |                           |                         |
| 1             | 6               | 0.028          | 9663       | -1.9        |                          |                     |                           |                         |
| 1             | 6               | 0.047          | 9789       | -1.8        |                          |                     |                           |                         |
| 1             | 4               | 0.047          | 10090      | -1.8        |                          |                     |                           |                         |
| 1             | 3               | 0.05           | 10600      | -1.9        | <b>COX5b</b>             | 20.2                | 2                         | 12.24                   |
| 2             | 6               | 0.043          | 11355      | -1.8        |                          |                     |                           |                         |
| 1             | 6               | 0.016          | 12538      | -1.8        |                          |                     |                           |                         |
| 2             | 4               | 0.021          | 15850      | +3.2        |                          |                     |                           |                         |
| 1             | 6               | 0.047          | 15887      | +2.3        |                          |                     |                           |                         |
| 1             | 3               | 0.009          | 15940      | +2.0        | <b>MBP</b>               | 80.21               | 10                        | 25.74                   |
| 2             | 4               | 0.021          | 16012      | +2.6        | <b>Hbb</b>               | 60.25               | 6                         | 51.37                   |
| 1             | 6               | 0.047          | 17203      | -2.1        |                          |                     |                           |                         |
| 2             | 6               | 0.021          | 22773      | -2.3        |                          |                     |                           |                         |
| 2             | 6               | 0.021          | 42700      | +2.0        | <b>Creatine Kinase B</b> | 70.26               | 7                         | 27.11                   |

\* probable doubly protonated species of 10090

\*\* probable doubly protonated species of 15940
